# Supplementary material
Source: Springer Nature journal article supplement (https://www.springermedizin.de/resource/supplementary/12874_2002_27_MOESM1_ESM.pdf/9433610)

### Separate 2- arm Trials

cancer deaths  
per 100,000

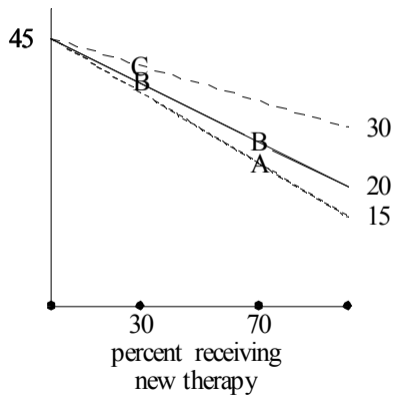

### Single 3- arm Trial

cancer deaths  
per 100,000

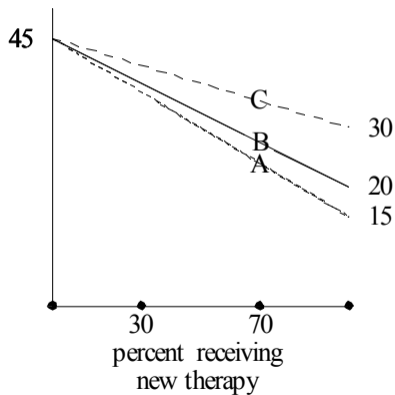

Supplement: MOESM1 [file 9433610]
